# Supplementary material for: Integrating deep learning and unbiased automated high-content screening to identify complex disease signatures in human fibroblasts
Source: Springer Nature journal article supplement (doi:10.1038/s41467-022-28423-4), 2022-03-25
Supplement: 41467_2022_28423_MOESM1_ESM.pdf [file 41467_2022_28423_MOESM1_ESM.pdf]

# **Integrating deep learning and unbiased automated high-content screening to identify complex disease signatures in human fibroblasts**

**Lauren Schiff<sup>1,3</sup>, Bianca Migliori<sup>2,3</sup>, Ye Chen<sup>1,3</sup>, Deidre Carter<sup>2,3</sup>, Caitlyn Bonilla<sup>1</sup>, Jenna Hall<sup>2</sup>, Minjie Fan<sup>1</sup>, Edmund Tam<sup>2</sup>, Sara Ahadi<sup>1</sup>, Brodie Fischbacher<sup>2</sup>, Anton Geraschenko<sup>1</sup>, Christopher J. Hunter<sup>2</sup>, Subhashini Venugopalan<sup>1</sup>, Sean DesMarteau<sup>2</sup>, Arunachalam Narayanaswamy<sup>1</sup>, Selwyn Jacob<sup>2</sup>, Zan Armstrong<sup>1</sup>, Peter Ferrarotto<sup>2</sup>, Brian Williams<sup>1</sup>, Geoff Buckley-Herd<sup>2</sup>, Jon Hazard<sup>1</sup>, Jordan Goldberg<sup>2</sup>, Marc Coram<sup>1</sup>, Reid Otto<sup>2</sup>, Edward A. Baltz<sup>1</sup>, Laura Andres-Martin<sup>2</sup>, Orion Pritchard<sup>1</sup>, Alyssa Duren-Lubanski<sup>2</sup>, Ameya Daigavane<sup>1</sup>, Kathryn Reggio<sup>2</sup>, NYSCF Global Stem Cell Array Team\*, Phillip C. Nelson<sup>1</sup>, Michael Frumkin<sup>1</sup>, Susan L. Solomon<sup>2</sup>, Lauren Bauer<sup>2</sup>, Raeka S. Aiyar<sup>2</sup>, Elizabeth Schwarzbach<sup>2</sup>, Scott A. Noggle<sup>2</sup>, Frederick J. Monsma, Jr.<sup>2</sup>, Daniel Paull<sup>2</sup>, Marc Berndl<sup>1</sup>, Samuel J. Yang<sup>1</sup>, Bjarki Johannesson<sup>2</sup>**

---

<sup>1</sup>Google Research, Mountain View, California, USA. <sup>2</sup>The New York Stem Cell Foundation Research Institute, New York, New York, USA. <sup>3</sup>These authors contributed equally: Lauren Schiff, Bianca Migliori, Ye Chen, Deidre Carter. \*A list of authors and their affiliations appears at the end of the paper. e-mail: [marcberndl@google.com](mailto:marcberndl@google.com); [samuely@google.com](mailto:samuely@google.com); [bjarki.johannesson@astrazeneca.com](mailto:bjarki.johannesson@astrazeneca.com)

NYSCF Global Stem Cell Array Team members: Barry McCarthy<sup>2</sup>, Camille Fulmore<sup>2</sup>, Daria LeGall<sup>2</sup>, Brandon Pearl<sup>2</sup>, Dong Woo Shin<sup>2</sup>, Dorota Moroziewicz<sup>2</sup>, Tomasz Rusielewicz<sup>2</sup>, Patrick Fenton<sup>2</sup>, Paul McCoy<sup>2</sup>, Jenna Hall<sup>2</sup>, Brodie Fischbacher<sup>2</sup>, Christopher J. Hunter<sup>2</sup>, Sean DesMarteau<sup>2</sup>, Selwyn Jacob<sup>2</sup>, Peter Ferrarotto<sup>2</sup>, Geoff Buckley-Herd<sup>2</sup>, Reid Otto<sup>2</sup>, Jordan Goldberg<sup>2</sup>, Kathryn Reggio<sup>2</sup>, Alyssa Duren-Lubanski<sup>2</sup>, Lauren Bauer<sup>2</sup>, Daniel Paull<sup>2</sup>

|       |              |            | Cross-validation |        |        |        |        |        |        |        |
|-------|--------------|------------|------------------|--------|--------|--------|--------|--------|--------|--------|
|       |              |            | set #1           | set #2 | set #3 | set #4 | set #5 | set #6 | set #7 | set #8 |
| Batch | Plate layout | Cell lines |                  |        |        |        |        |        |        |        |
| 1     | 1            | all 96     | test             | ignore | ignore | ignore | ignore | train  | train  | train  |
|       | 2            | all 96     | ignore           | train  | train  | train  | test   | ignore | ignore | ignore |
| 2     | 1            | all 96     | ignore           | test   | ignore | ignore | train  | ignore | train  | train  |
|       | 2            | all 96     | train            | ignore | train  | train  | ignore | test   | ignore | ignore |
| 3     | 1            | all 96     | ignore           | ignore | test   | ignore | train  | train  | ignore | train  |
|       | 2            | all 96     | train            | train  | ignore | train  | ignore | ignore | test   | ignore |
| 4     | 1            | all 96     | ignore           | ignore | ignore | test   | train  | train  | train  | ignore |
|       | 2            | all 96     | train            | train  | train  | ignore | ignore | ignore | ignore | test   |

**Supplementary Table 1 | Cross-validation strategy for 96-way cell line classification.** For each of 8 cross-validation sets, both batch and plate layout were held out in the test set.

|       |              |                     | Cross-validation |        |        |        |        |        |        |        |
|-------|--------------|---------------------|------------------|--------|--------|--------|--------|--------|--------|--------|
|       |              |                     | set #1           | set #2 | set #3 | set #4 | set #5 | set #6 | set #7 | set #8 |
| Batch | Plate layout | Cell lines          |                  |        |        |        |        |        |        |        |
| 1     | 1            | 5 held-out biopsies | test             | ignore | ignore | ignore | ignore | ignore | ignore | ignore |
|       |              | remaining 91 lines  | ignore           | ignore | ignore | ignore | ignore | train  | train  | train  |
|       | 2            | 5 held-out biopsies | ignore           | ignore | ignore | ignore | test   | ignore | ignore | ignore |
|       |              | remaining 91 lines  | ignore           | train  | train  | train  | ignore | ignore | ignore | ignore |
| 2     | 1            | 5 held-out biopsies | ignore           | test   | ignore | ignore | ignore | ignore | ignore | ignore |
|       |              | remaining 91 lines  | ignore           | ignore | ignore | ignore | train  | ignore | train  | train  |
|       | 2            | 5 held-out biopsies | ignore           | ignore | ignore | ignore | ignore | test   | ignore | ignore |
|       |              | remaining 91 lines  | train            | ignore | train  | train  | ignore | ignore | ignore | ignore |
| 3     | 1            | 5 held-out biopsies | ignore           | ignore | test   | ignore | ignore | ignore | ignore | ignore |
|       |              | remaining 91 lines  | ignore           | ignore | ignore | ignore | train  | train  | ignore | train  |
|       | 2            | 5 held-out biopsies | ignore           | ignore | ignore | ignore | ignore | ignore | test   | ignore |
|       |              | remaining 91 lines  | train            | train  | ignore | train  | ignore | ignore | ignore | ignore |
| 4     | 1            | 5 held-out biopsies | ignore           | ignore | ignore | test   | ignore | ignore | ignore | ignore |
|       |              | remaining 91 lines  | ignore           | ignore | ignore | ignore | train  | train  | train  | ignore |
|       | 2            | 5 held-out biopsies | ignore           | ignore | ignore | ignore | ignore | ignore | ignore | test   |
|       |              | remaining 91 lines  | train            | train  | train  | ignore | ignore | ignore | ignore | ignore |

**Supplementary Table 2 | Cross-validation strategy for 91-way biopsy donor classification.** For each of 8 cross-validation sets, the test set consisted of cell lines from one of the two biopsies from the 5 individuals who donated two biopsies, while the train set consisted of cell lines from the complementary set of biopsies from these 5 individuals and the remaining 86 individuals who donated only a single biopsy. To avoid plate position biases as potential confounds, plate layout was also held out, and to assess model generalization to a test biopsy acquired in a new batch, batch was also held out. These 8 cross-validation sets were conducted twice, once holding out in the test sets the earlier set of skin biopsies from the 5 individuals who donated two biopsies (cell lines 08, 39, 51, 55, 70), and again holding out the later set (cell lines 91, 92, 93, 94, 95).

|                                                                                                                                                                                                                                                                                                                                                                                                                                                                                                                                                    |                                                                                                                                      |                                                                                                                  |
|----------------------------------------------------------------------------------------------------------------------------------------------------------------------------------------------------------------------------------------------------------------------------------------------------------------------------------------------------------------------------------------------------------------------------------------------------------------------------------------------------------------------------------------------------|--------------------------------------------------------------------------------------------------------------------------------------|------------------------------------------------------------------------------------------------------------------|
| cells_AreaShape_Compactness<br>cells_AreaShape_Eccentricity<br>cytoplasm_AreaShape_Compactness<br>cytoplasm_AreaShape_Eccentricity                                                                                                                                                                                                                                                                                                                                                                                                                 | cytoplasm_AreaShape_Solidity<br>cytoplasm_AreaShape_Extent<br>cells_AreaShape_Solidity                                               | nuclei_Granularity_11_ER<br>nuclei_Granularity_8_ER<br>nuclei_Granularity_7_ER                                   |
| cells_AreaShape_Zernike_8_4                                                                                                                                                                                                                                                                                                                                                                                                                                                                                                                        | cytoplasm_AreaShape_Zernike_6_4<br>cytoplasm_AreaShape_Zernike_8_8<br>cells_AreaShape_Zernike_6_6<br>cytoplasm_AreaShape_Zernike_6_6 | nuclei_Granularity_13_Mito                                                                                       |
| cells_Correlation_K_ER_RNA<br>cytoplasm_Correlation_K_ER_RNA<br>cytoplasm_Correlation_K_ER_DNA                                                                                                                                                                                                                                                                                                                                                                                                                                                     | cytoplasm_Correlation_Correlation_Mito_ER<br>cells_Correlation_Correlation_Mito_ER                                                   | nuclei_Granularity_14_DNA                                                                                        |
| cells_Correlation_Overlap_DNA_ER                                                                                                                                                                                                                                                                                                                                                                                                                                                                                                                   | cytoplasm_Correlation_Manders_AGP_DNA<br>cytoplasm_Correlation_Manders_RNA_DNA<br>cytoplasm_Correlation_Manders_Mito_DNA             | nuclei_Granularity_2_Mito                                                                                        |
| cells_Correlation_Overlap_ER_RNA                                                                                                                                                                                                                                                                                                                                                                                                                                                                                                                   | cytoplasm_Correlation_RWC_DNA_AGP                                                                                                    | nuclei_Granularity_4_Mito                                                                                        |
| cells_Correlation_Overlap_Mito_ER<br>cytoplasm_Correlation_Overlap_Mito_ER                                                                                                                                                                                                                                                                                                                                                                                                                                                                         | cytoplasm_Granularity_10_RNA                                                                                                         | nuclei_Granularity_6_ER                                                                                          |
| cells_Correlation_RWC_RNA_Mito                                                                                                                                                                                                                                                                                                                                                                                                                                                                                                                     | cytoplasm_Granularity_1_AGP<br>cells_Granularity_1_AGP                                                                               | nuclei_Granularity_8_Mito                                                                                        |
| cells_Granularity_6_AGP<br>cells_Granularity_7_AGP                                                                                                                                                                                                                                                                                                                                                                                                                                                                                                 | cytoplasm_RadialDistribution_MeanFrac_AGP_1of4<br>cytoplasm_RadialDistribution_MeanFrac_AGP_3of4                                     | nuclei_Granularity_8_RNA                                                                                         |
| cells_Intensity_IntegratedIntensity_Mito<br>cytoplasm_Intensity_MassDisplacement_AGP<br>cytoplasm_AreaShape_Area<br>cytoplasm_Intensity_IntegratedIntensity_RNA<br>cells_AreaShape_MeanRadius<br>cells_AreaShape_MaximumRadius<br>cytoplasm_Intensity_IntegratedIntensityEdge_Mito<br>cells_Intensity_IntegratedIntensityEdge_Mito<br>cytoplasm_Intensity_IntegratedIntensity_Mito<br>cells_AreaShape_Area<br>cytoplasm_Intensity_IntegratedIntensity_DNA<br>cells_Intensity_IntegratedIntensity_RNA<br>cytoplasm_Intensity_IntegratedIntensity_ER | cytoplasm_RadialDistribution_MeanFrac_RNA_3of4<br>cells_Granularity_15_RNA                                                           | nuclei_Intensity_IntegratedIntensityEdge_ER<br>nuclei_Texture_Contrast_ER_10_02                                  |
| cells_Intensity_MassDisplacement_DNA                                                                                                                                                                                                                                                                                                                                                                                                                                                                                                               | cytoplasm_RadialDistribution_RadialCV_AGP_3of4                                                                                       | nuclei_Intensity_IntegratedIntensity_RNA                                                                         |
| cells_Intensity_MassDisplacement_DNA                                                                                                                                                                                                                                                                                                                                                                                                                                                                                                               | cytoplasm_RadialDistribution_RadialCV_RNA_2of4                                                                                       | nuclei_Intensity_IntegratedIntensity_ER                                                                          |
| cells_Neighbors_PercentTouching_5<br>cells_Neighbors_PercentTouching_Adjacent<br>cells_Neighbors_NumberOfNeighbors_5<br>cells_Neighbors_NumberOfNeighbors_Adjacent                                                                                                                                                                                                                                                                                                                                                                                 | nuclei_AreaShape_Zernike_2_0                                                                                                         | nuclei_Neighbors_NumberOfNeighbors_1                                                                             |
| cells_RadialDistribution_FracAtD_AGP_1of4                                                                                                                                                                                                                                                                                                                                                                                                                                                                                                          | nuclei_AreaShape_Zernike_4_2                                                                                                         | nuclei_Neighbors_SecondClosestDistance_1                                                                         |
| cells_RadialDistribution_MeanFrac_ER_3of4                                                                                                                                                                                                                                                                                                                                                                                                                                                                                                          | nuclei_AreaShape_Zernike_7_1                                                                                                         | nuclei_RadialDistribution_FracAtD_RNA_3of4                                                                       |
| cells_RadialDistribution_MeanFrac_RNA_4of4                                                                                                                                                                                                                                                                                                                                                                                                                                                                                                         | nuclei_Correlation_Correlation_DNA_RNA                                                                                               | nuclei_RadialDistribution_MeanFrac_AGP_2of4                                                                      |
|                                                                                                                                                                                                                                                                                                                                                                                                                                                                                                                                                    | nuclei_Correlation_Correlation_ER_AGP<br>nuclei_Correlation_Correlation_Mito_AGP                                                     | nuclei_RadialDistribution_MeanFrac_Mito_3of4<br>nuclei_Correlation_Correlation_DNA_Mito                          |
|                                                                                                                                                                                                                                                                                                                                                                                                                                                                                                                                                    | nuclei_Correlation_Manders_AGP_DNA<br>nuclei_Correlation_Manders_RNA_DNA                                                             | nuclei_RadialDistribution_MeanFrac_Mito_4of4                                                                     |
|                                                                                                                                                                                                                                                                                                                                                                                                                                                                                                                                                    | nuclei_Correlation_Manders_Mito_ER<br>nuclei_Correlation_Manders_RNA_ER                                                              | nuclei_RadialDistribution_RadialCV_AGP_3of4                                                                      |
|                                                                                                                                                                                                                                                                                                                                                                                                                                                                                                                                                    | nuclei_Correlation_Overlap_DNA_AGP                                                                                                   | nuclei_RadialDistribution_RadialCV_ER_1of4                                                                       |
|                                                                                                                                                                                                                                                                                                                                                                                                                                                                                                                                                    |                                                                                                                                      | nuclei_RadialDistribution_RadialCV_ER_3of4<br>nuclei_RadialDistribution_RadialCV_ER_2of4                         |
|                                                                                                                                                                                                                                                                                                                                                                                                                                                                                                                                                    |                                                                                                                                      | nuclei_RadialDistribution_RadialCV_RNA_4of4<br>cells_RadialDistribution_RadialCV_RNA_3of4                        |
|                                                                                                                                                                                                                                                                                                                                                                                                                                                                                                                                                    |                                                                                                                                      | nuclei_Texture_Correlation_AGP_10_01<br>nuclei_Texture_InfoMeas2_AGP_10_01<br>nuclei_Texture_InfoMeas2_AGP_10_03 |

**Supplementary Table 3 | Most common important CellProfiler features grouped based on correlation.** The top 100 most important CellProfiler features from Fig. 6a, filtered down to 55, based on Pearson correlation, and then grouped semantically.

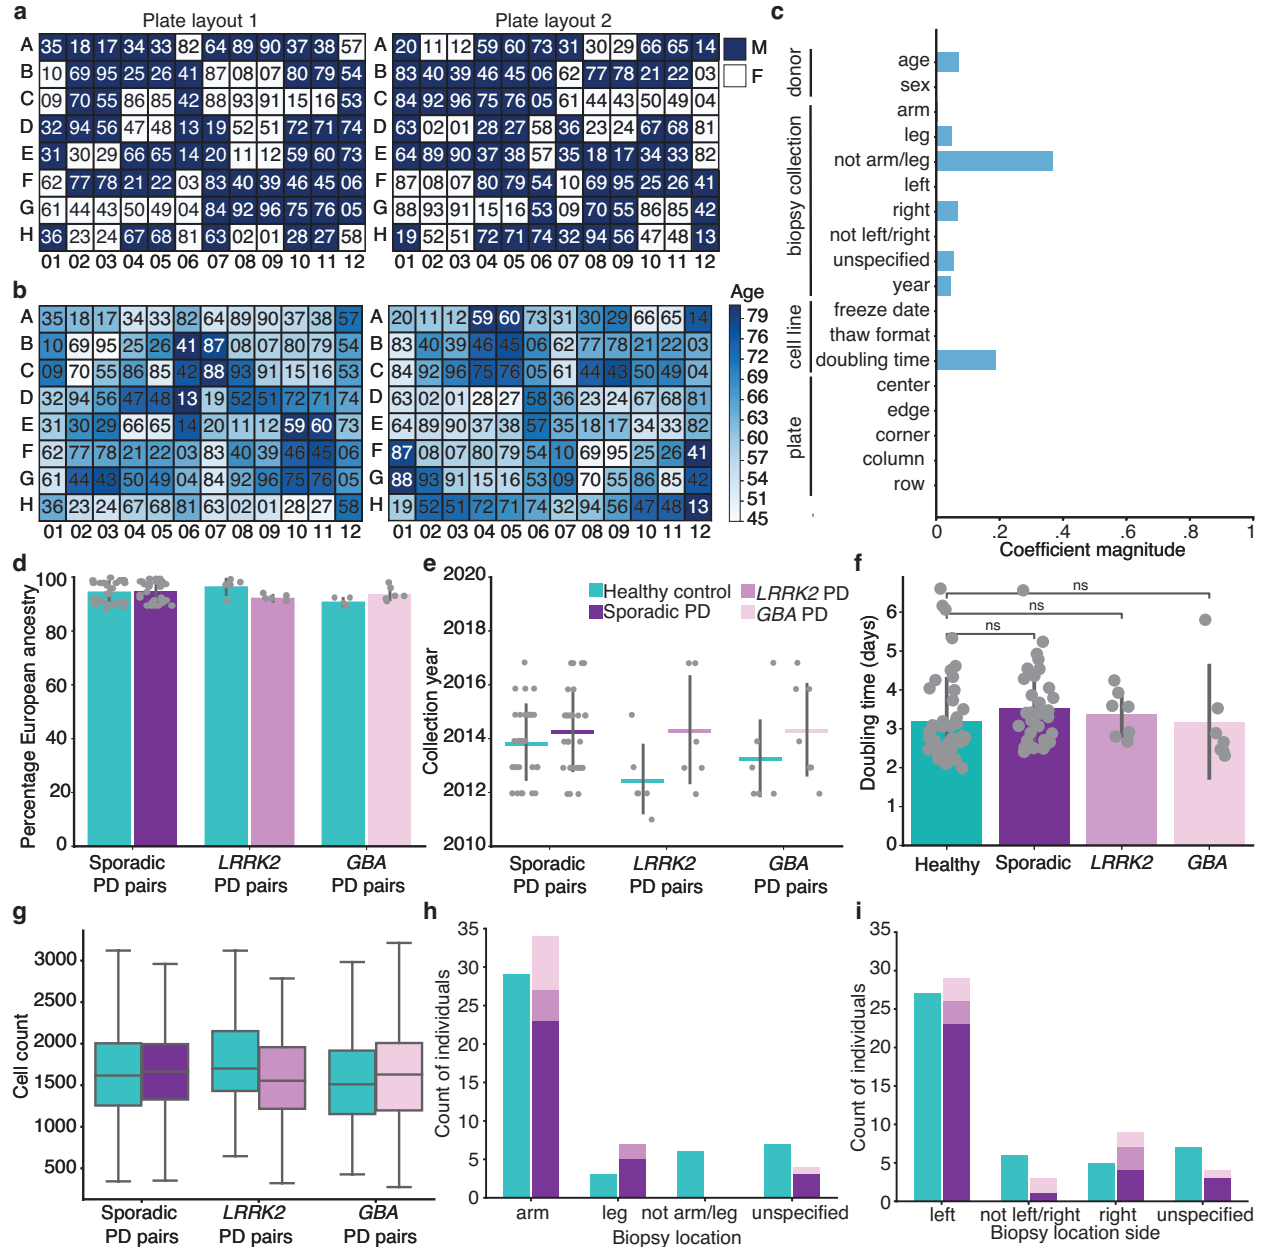

**Supplementary Fig. 1 | Experiment design details for high-content screening.** Various donor demographics including (a) sex (male (M), female (F)) and (b) age for the two 96-well plate layouts, where each well contains cells from the cell line denoted by the two-digit label. c, Lasso variable selection for healthy vs. PD on donor, biopsy, cell line, and plate covariates reveals no significant biases. Distributions of additional cell line covariates including (d) percentage European ancestry from genotyping analysis, (e) biopsy collection year, (f) cell doubling times (two-sided Mann–Whitney  $U = 57.0, P = 0.01$  for sporadic,  $U = 118.0, P = 0.64$  for *LRRK2* PD, and  $U = 193.5, P = 1.00$  for *GBA* PD vs. healthy, respectively, ns:  $P > 0.05$ ), (g) well-level cell count, and biopsy location, (h) arm or leg and (i) left or right. Box plot components are: horizontal line, median; box, interquartile range; whiskers, 1.5× interquartile range. Bar plot data are presented as mean values +/- standard deviation.

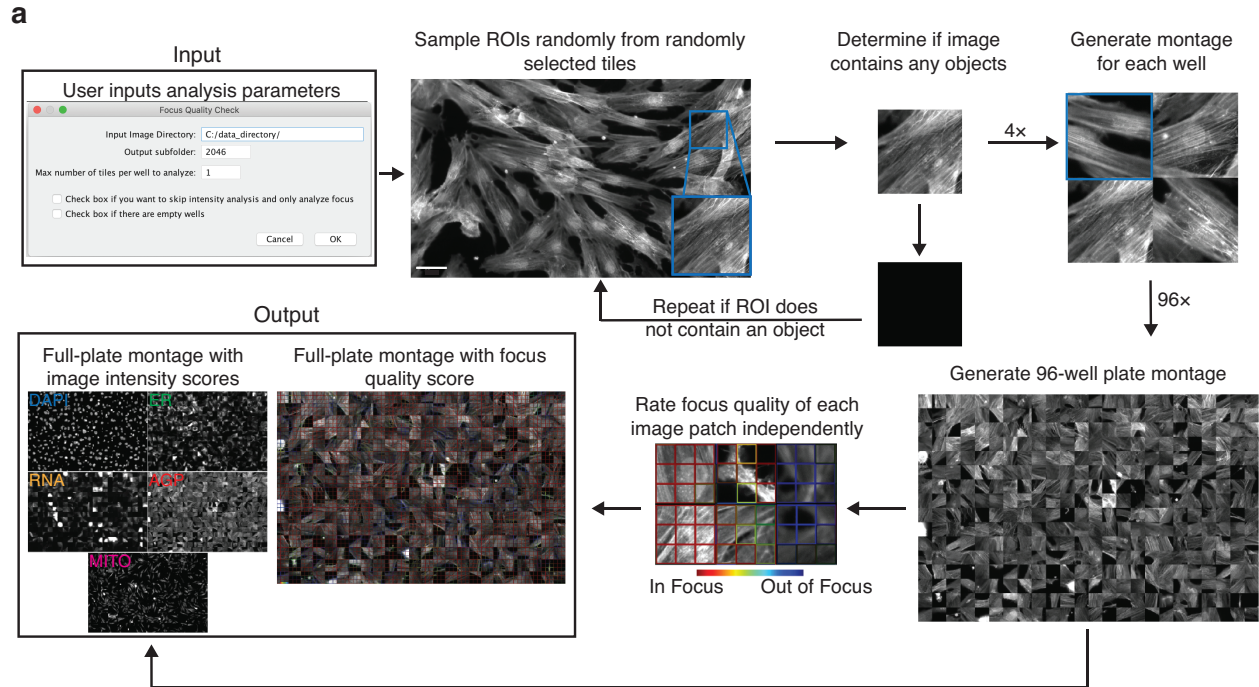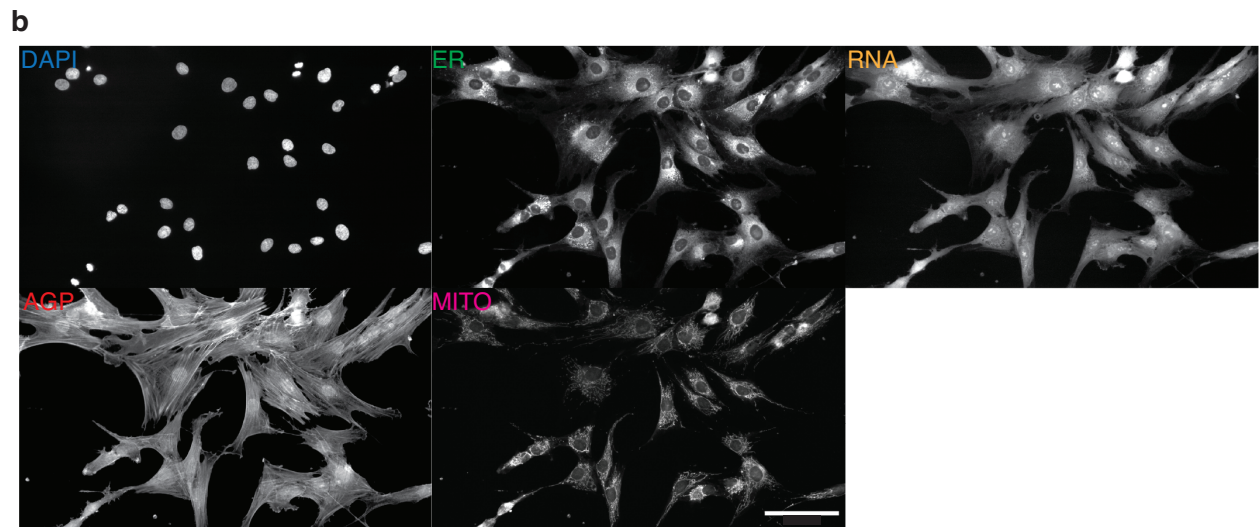

**Supplementary Fig. 2 | Overview of near real-time image quality analysis and sample Cell Painting images of primary human fibroblasts.** A Fiji (an ImageJ distribution) macro assesses the quality and consistency of the images sampled from a full 96-well plate. **a**, Four random regions of interest (ROI) are cropped from images in each channel and in each well, and 96-well montages are constructed for viewing. A measurement of mean image intensity across the plate is reported for each plate montage. Next, the montage corresponding to the user-designated focus channel is inputted to a microscope image focus classifier which calculates a focus quality score for each image patch. For visualization, a color-coded overlay on top of the montage highlights regions that are in focus (red) or out of focus (blue). Scale bar: 50  $\mu\text{m}$ . **b**, Sample images of one tile from the 5 Cell Painting channels. Sample images are representative of those from 48 experimental well plates across 4 experimental batches. Scale bar: 100  $\mu\text{m}$ .

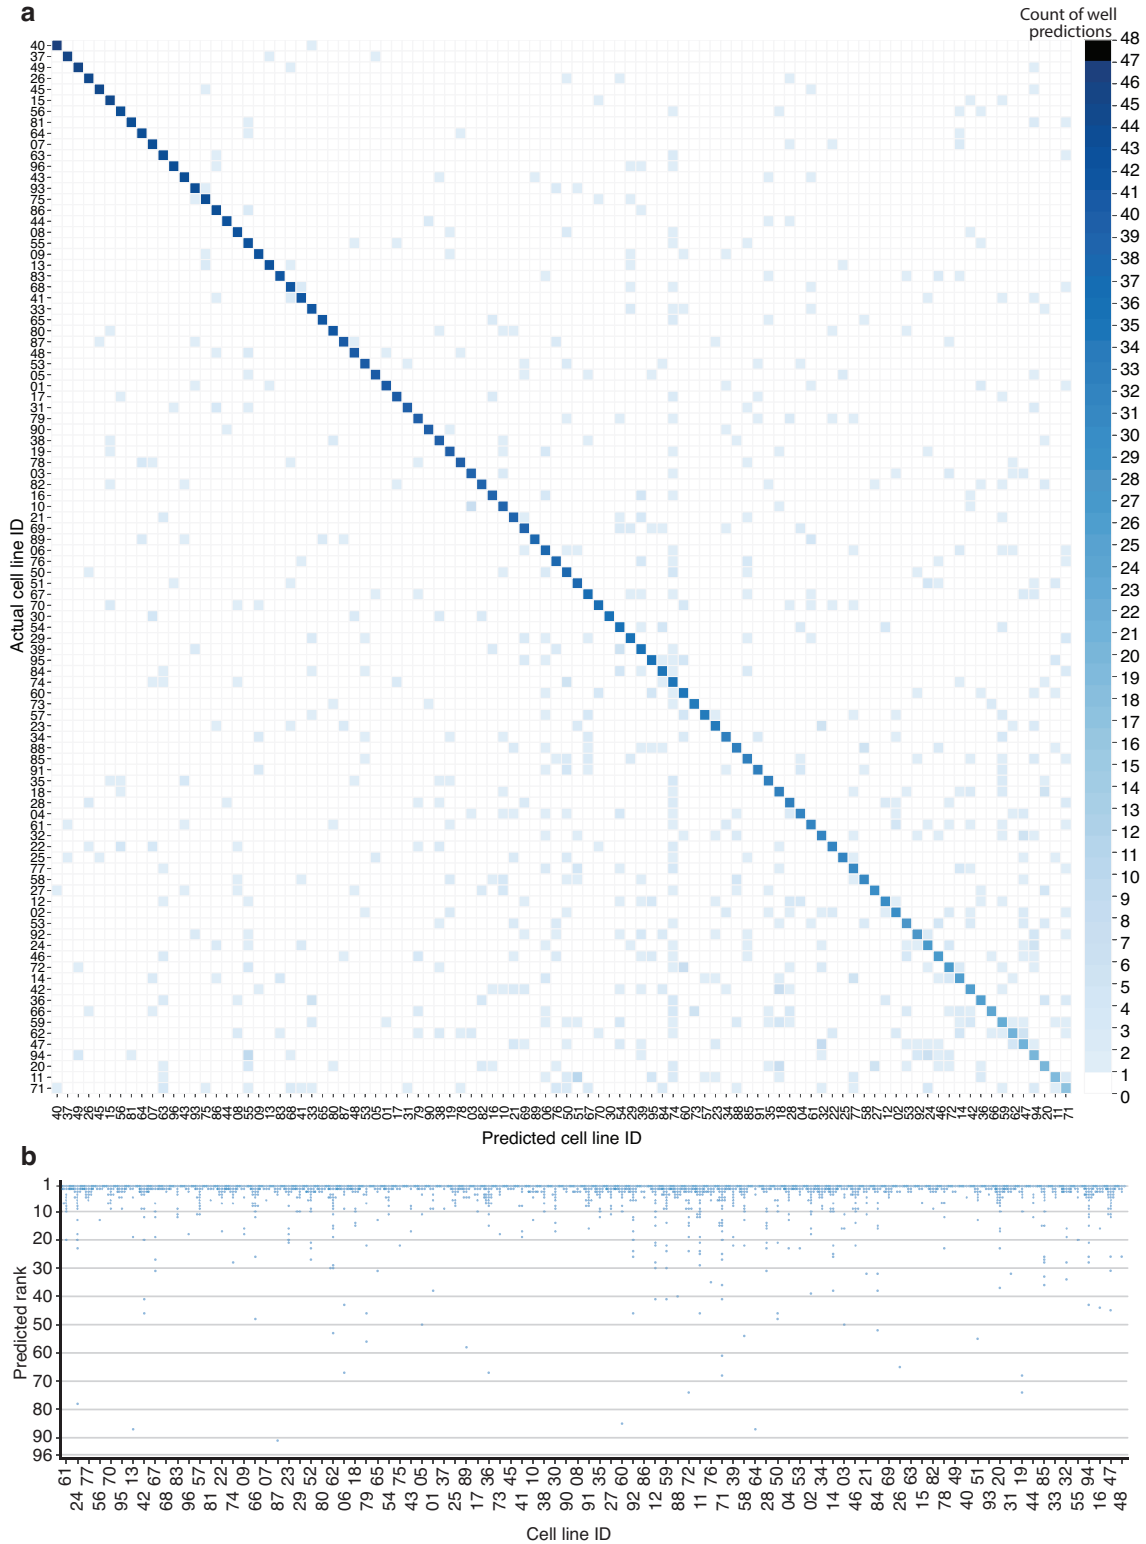

**Supplementary Fig. 3 | Identification of individual cell lines in held-out batches and plate layouts at the well-level. a**, Confusion matrix, sorted by the diagonal, showing the test set well-level predicted and actual cell lines for each of 6 wells in each of 8 held-out batch and held-out plate layouts for the model in **Fig. 3c**. **b**, Test set well-level predicted rank, among 96 of the 6 wells in each of 8 held-out batch and held-out plate layouts for the model in **Fig. 3c**.

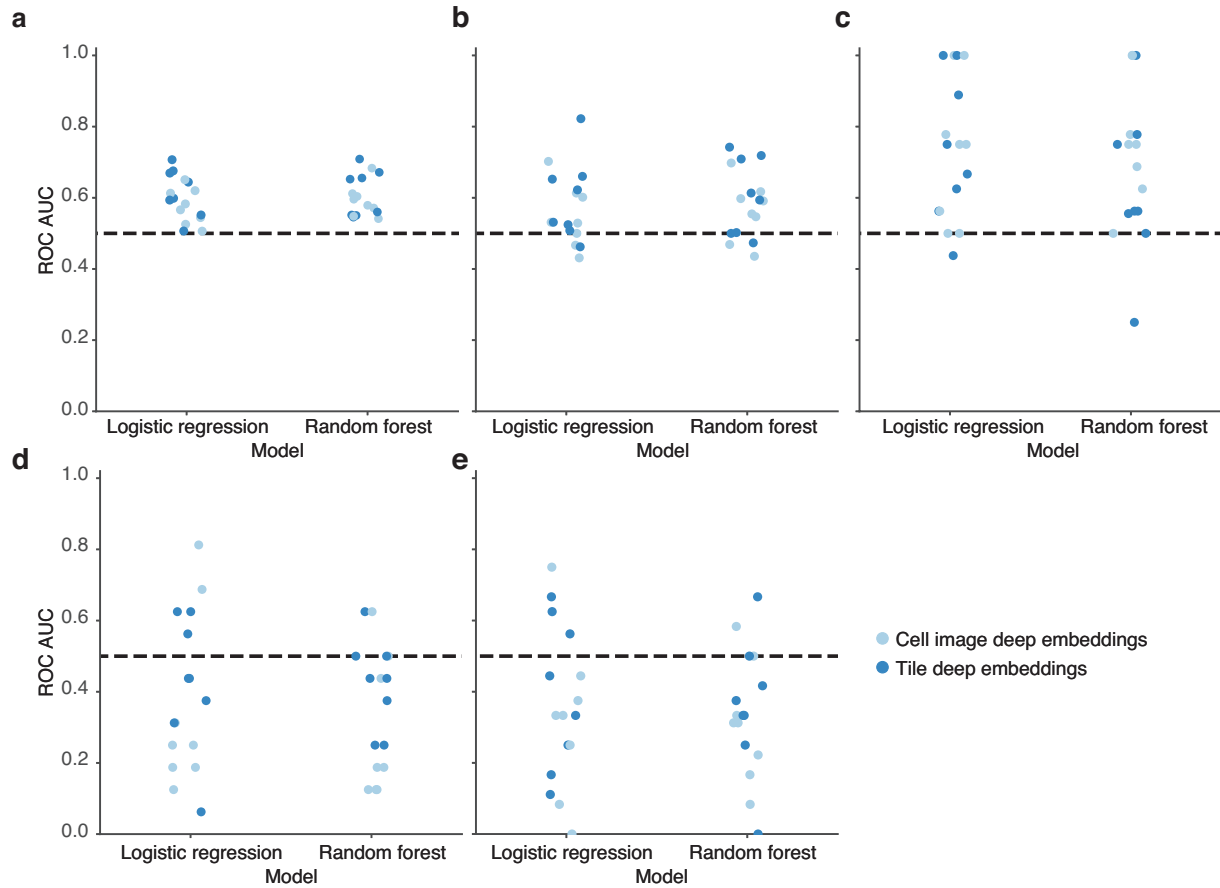

**Supplementary Fig. 4 | Preliminary evaluation of PD classification performance.** Test set cell line–level PD classification for (a) all PD ( $n = 45$  participants) and matched controls ( $n = 45$  participants), (b) sporadic PD ( $n = 31$ ) and matched controls ( $n = 31$  participants), (c) *LRRK2* PD ( $n = 6$  participants) and matched controls ( $n = 6$  participants), (d) *GBA* PD ( $n = 8$  participants) and matched controls ( $n = 8$  participants), and (e) *GBA* PD ( $n = 7$  participants) and matched controls ( $n = 7$  participants), excluding cell lines 48 (unconfirmed *GBA*) and 77 (Healthy with *GBA*); see Methods. In each case, for cross-validation, matched cell line pairs were randomly divided into a train half and a test half 8 times. Dashed line denotes chance performance.

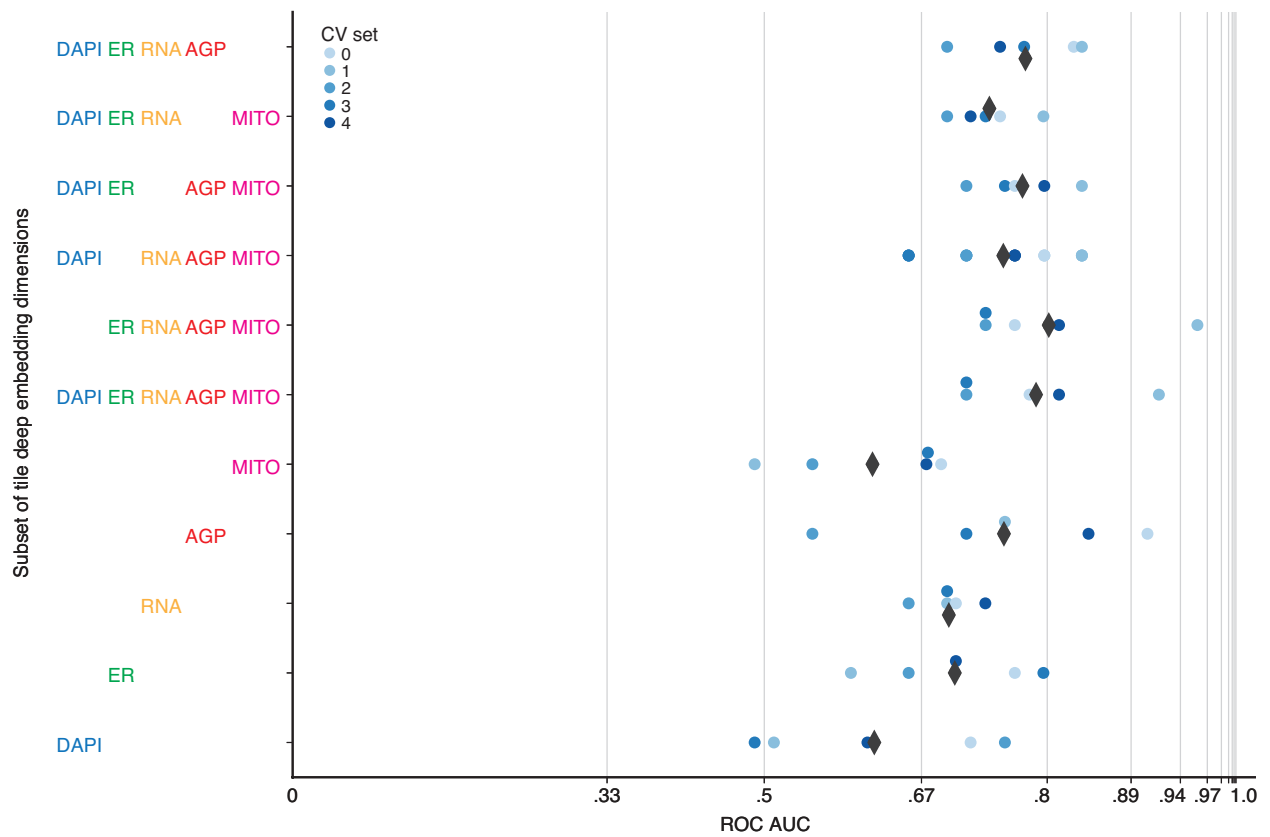

**Supplementary Fig. 5 | Impact of individual Cell Painting channels on PD classification.** The same logistic regression model with tile deep embeddings from **Fig. 5b** evaluated with a subset of the deep embedding dimensions corresponding to a subset of the 5 channels. Black diamonds denote the mean across all cross-validation (CV) sets. Grid line spacing denotes a doubling of the odds of correctly ranking a random healthy control and PD cell line. Dashed line denotes chance performance.



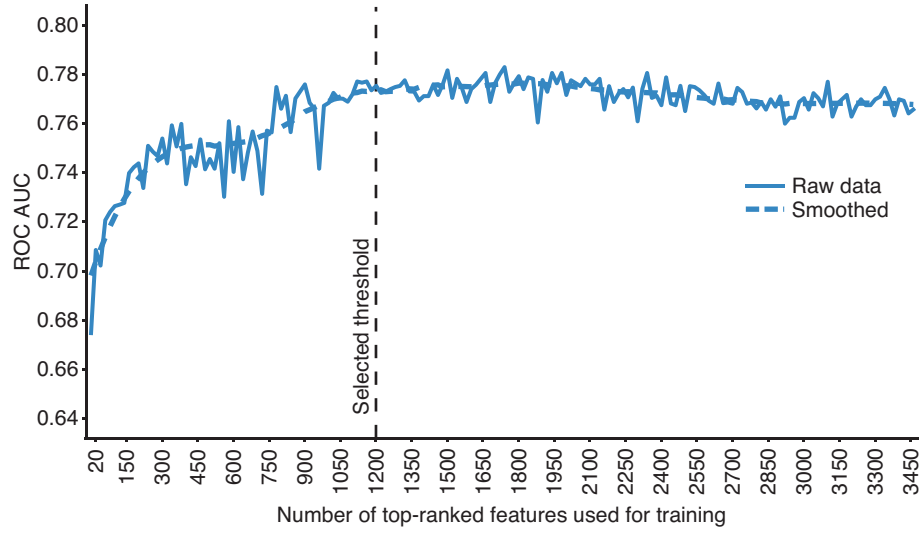

**Supplementary Fig. 6 | Estimating threshold for number of top-ranked CellProfiler features required for PD classification.** Performance of the random forest classifier as a function of number of top-ranked features used for training, evaluated in increments of 20 features. The dashed line represents the threshold selected for subsequent analyses.
